Title: THE EFFECT OF AGE ON CEREBRAL BLOOD FLOW AUTOREGULATION DURING HYPOTHERMIC CARDIOPULMONARY BYPASS

Author: F.G. Brusino, M.D., J.G. Reves, M.D., D.S. Prough, M.D.\*, D.A. Stump, Ph.D.\*,  
N.D. Croughwell, CRNA

Affiliation: Department of Anesthesiology, Duke University Medical Center, Durham, North Carolina 27710  
\*Departments of Anesthesia and Neurology, Wake Forest University Medical Center, Bowman Gray  
School of Medicine, Winston-Salem, North Carolina 27103

**Introduction:** Advanced age has been implicated as a risk factor associated with a greater incidence of post-operative neuropsychiatric complications following cardiopulmonary bypass (CPB)<sup>1,2,3,4,5</sup>. It is possible that advanced age may be associated with decrements in cerebral blood flow (CBF) and/or deleterious alterations in the autoregulation of CBF during CPB. The hypothesis tested is that age alters regional CBF and impairs normal autoregulation during hypothermic CPB.

**Methods:** After approval by IRB and informed consent, CBF measurements were obtained in patients undergoing hypothermic CPB using Xenon<sup>133</sup> clearance methodology<sup>6,7</sup>. Patients were grouped into those less than or equal to 50 years of age (group I - 7 patients) and those greater than 65 years of age (group II - 9 patients). Two extracranial gamma emission detectors were placed over the right and left temporal lobes and the average values from both sites were used to determine CBF. Patients with symptomatic cerebrovascular disease were excluded. All patients received diazepam 0.1mg/kg orally and morphine sulfate 0.1mg/kg intramuscularly approximately 60 and 90 minutes prior to the induction of anesthesia, respectively. Anesthetic management prior to CBF determinations included fentanyl (maximum dose of 100 µg/kg IV), diazepam (maximum dose of 0.2 mg/kg IV), and vecuronium (0.1 mg/kg) as required for neuromuscular blockade. CBF determinations were made over a wide mean arterial pressure (MAP) range at a pump flow of 1.6 l/min/m<sup>2</sup> and at hypothermic conditions (nasopharyngeal temperature 22-27°C). No vasoactive agents were used during CPB prior to CBF determinations. Blood gas management during the study period was directed at maintaining a pH of 7.4 (range 7.31 - 7.41), PCO<sub>2</sub> of 40mmHg (range 36 - 43), and PO<sub>2</sub> of < 250mmHg (range 94 - 246) which were not corrected for temperature. Mean CBF values were obtained for both groups. The mean values were then compared by Student's 2-tailed unpaired t-test. Linear regression analysis was also applied to both groups to determine the correlation between MAP and CBF.

**Results:** CBF ranged from 14 to 31 ml/100gm/min in patients in group I and 11 to 49 ml/100gm/min in patients in group II. Mean CBF was 21 ± 5.6 ml/100gm/min in patients in group I and 22 ± 6.5 ml/100gm/min in patients in group II. There was no statistically significant difference between the two groups (p = .3452). There was a poor association between MAP and CBF in both groups: group I - n=11, r=.032, p=.9259 and group II - n=15, r=.13, p=.645.

**Discussion:** These data demonstrate that age has no effect on CBF during hypothermic CPB throughout a wide range of MAP (30-90 mmHg). Furthermore, there is no correlation between MAP and CBF in either age group, suggesting that autoregulation is preserved in both groups.

#### References:

1. Branthwaite MA: Detection of neurological damage during open heart surgery. *Thorax* 28:464-472, 1973.
2. Stockard JJ, Bickford RG, Shauble JF: Pressure-dependent cerebral ischemia during cardiopulmonary bypass. *Neurology* 23:521, 1973.
3. Kolkka R, Hilberman M: Neurologic dysfunction following cardiac operation with low flow, low pressure CPB. *J Thoracic Cardiovasc Surg* 79:432, 1980.
4. Slogoff S, Girgis KZ, Keats AS: Etiologic factors in neuropsychiatric complications associated with cardiopulmonary bypass. *Anesth Analg* 61:903, 1982.
5. Ellis RJ, Wisniewski A, Potts R, Calhoun C, Loucks P, Wells MR: Reduction of flow rate and arterial pressure at moderate hypothermia does not result in cerebral dysfunction. *J Thorac Cardiovasc Surg* 79:173, 1980.
6. Olesen J, Paulson OB, Lassen NA: Regional cerebral blood flow in man determined by the initial slope of the clearance of intraarterially injected <sup>133</sup>Xe. *Stroke* 2:519-540, 1971.
7. Waltz AG, Wanek AR, Anderson RE: Comparison of analytic methods for calculation of cerebral blood flow after intracarotid injection of <sup>133</sup>Xe. *J Nucl Med* 13:66, 1971.

Figure 1:

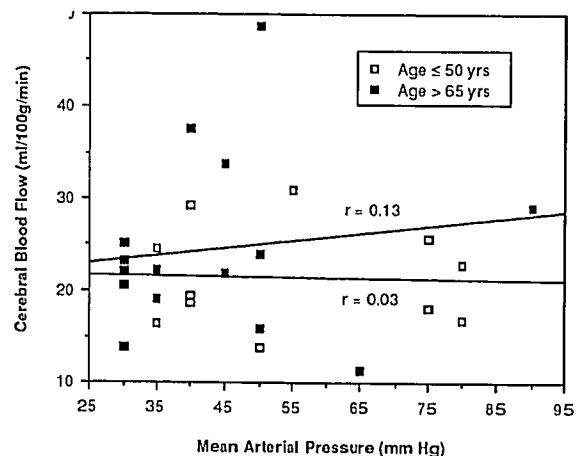

Source: https://asa2.silverchair.com/anesthesiology/article-pdf/67/3/A10/633899/0000542-198709001-00010.pdf
